# Supplementary material for: A remarkable genetic shift in a transmitted/founder virus broadens antibody responses against HIV-1
Source: eLife journal article supplement (doi:10.7554/elife.92379), 2024-01-24
Supplement: fig3-data2 [file Data used for graph 3C-D.xls]

## Sheet: CH58 antibody
	T/F07	T/F07	T/F07	H173Y	H173Y	H173Y	△DSV	△DSV	△DSV	H173Y +△DSV	H173Y +△DSV	H173Y +△DSV	gp16	gp16	gp16
0.01	0.1503	0.1423	0.1371	0.0666	0.0671	0.0683	0.1339	0.1295	0.1287	0.0693	0.0676	0.0681	0.0441	0.0662	0.0431
0.1	0.7746	0.7206	0.7009	0.2561	0.2512	0.2457	0.6525	0.6526	0.6395	0.2503	0.2535	0.2438	0.0387	0.0437	0.0378
1	1.1159	1.0797	1.0588	0.5964	0.5854	0.5672	0.9471	0.9439	0.9264	0.5802	0.5768	0.5721	0.0531	0.0364	0.0366
2	1.2093	1.1949	1.1297	0.7487	0.7255	0.7413	1.0427	1.0171	0.9905	0.7018	0.6965	0.6897	0.05	0.0386	0.038

## Sheet: CH59 antibody
	T/F07	T/F07	T/F07	H173Y	H173Y	H173Y	△DSV	△DSV	△DSV	H173Y +△DSV	H173Y +△DSV	H173Y +△DSV	gp16	gp16	gp16
0.01	0.1326	0.1149	0.12	0.0404	0.0393	0.0404	0.1079	0.1132	0.1151	0.0383	0.0382	0.0412	0.0486	0.0576	0.043
0.1	0.5932	0.5547	0.5586	0.0371	0.0444	0.0427	0.5029	0.522	0.5152	0.0376	0.0387	0.0403	0.046	0.0438	0.0394
1	0.9559	0.9467	0.9162	0.039	0.0444	0.0396	0.8409	0.9083	0.9013	0.0398	0.0426	0.0396	0.046	0.0428	0.1102
2	1.0372	0.9986	0.9877	0.0416	0.0387	0.0387	0.8928	0.9239	0.8992	0.0404	0.0398	0.0382	0.0442	0.039	0.0396
