# Supplementary material for: A remarkable genetic shift in a transmitted/founder virus broadens antibody responses against HIV-1
Source: eLife journal article supplement (doi:10.7554/elife.92379), 2024-01-24
Supplement: fig3-data2 [file Data used for graph in Figure 3A.xls]

## Sheet: Data used for graph in Fig 3A
	T/F07	T/F07	T/F07	H173Y	H173Y	H173Y	△DSV	△DSV	△DSV	H173Y+△DSV	H173Y+△DSV	H173Y+△DSV
Week	Mean	Error (+)	Error (-)	Mean	Error (+)	Error (-)	Mean	Error (+)	Error (-)	Mean	Error (+)	Error (-)
w0	0	0	0	0.95	0.09	0.09	0.28	0.22	0.22	0.61	0.15	0.15
w0.3	0	0	0	0.61	0.05	0.05	0.54	0.38	0.38	0.66	0.32	0.32
w1	0	0	0	1.06	0.09	0.09	0.63	0.31	0.31	0.7	0.22	0.22
w1.5	0	0	0	0.74	0.44	0.44	0.62	0.2	0.2	0.89	0.31	0.31
w2	0	0	0	0.76	0.32	0.32	1.34	0.25	0.25	1.23	0.68	0.68
w2.5	0.93	0.24	0.24	0.4	0.1	0.1	3.93	0.25	0.25	0.67	0.36	0.36
w3	2.68	0.29	0.29	0.73	0.14	0.14	4.59	0.4	0.4	1	0.38	0.38
w3.5	1.89	0.26	0.26	0.6	0.19	0.19	4.75	0.46	0.46	1.15	0.41	0.41
w4	2.82	0.29	0.29	0.65	0.13	0.13	5.25	0.51	0.51	0.91	0.23	0.23
w5	2.6	0.46	0.46	0.62	0.31	0.31	4.3	0.52	0.52	0.75	0.21	0.21
w6	4.03	0.46	0.46	0.31	0.11	0.11	5.94	0.46	0.46	0.9	0.53	0.53
w7	7	0.62	0.62	0.2	0.16	0.16	8.48	0.73	0.73	0.11	0.07	0.07
w12	40.73	3	3	0	0	0	40.04	3.12	3.12	0	0	0
w24	62.23	4.35	4.35	0.37	0.36	0.36	61.76	4.7	4.7	0.13	0.09	0.09
w36	15.48	1.12	1.12	0.35	0.26	0.26	16.42	1.17	1.17	0.02	0.03	0.03
w48	15.13	0.89	0.89	4.59	0.79	0.79	15.19	1.28	1.28	3.65	0.83	0.83
w60	25.46	1.86	1.86	15.44	2.05	2.05	25.15	2.26	2.26	13.98	2.13	2.13
w76	46.47	3.49	3.49	32.43	3.8	3.8	44.1	4.16	4.16	29.4	3.97	3.97
w88	26.84	2.26	2.26	19.13	2.19	2.19	26.68	2.78	2.78	17.86	2.5	2.5
w100	12.33	1	1	9.21	1.23	1.23	12.45	1.48	1.48	7.86	1.11	1.11
w111	13.6	1.36	1.36	9.97	1.38	1.38	13.22	1.52	1.52	8.85	1.43	1.43
w125	18.31	1.57	1.57	13.51	1.96	1.96	17.03	1.93	1.93	11.42	1.57	1.57
w137	14.57	1.09	1.09	11	1.55	1.55	14	1.66	1.66	9.46	1.39	1.39
w148	18.67	1.61	1.61	13.85	1.96	1.96	17.66	1.96	1.96	12	1.68	1.68
