# Supplementary material for: A remarkable genetic shift in a transmitted/founder virus broadens antibody responses against HIV-1
Source: eLife journal article supplement (doi:10.7554/elife.92379), 2024-01-24
Supplement: fig6-data1 [file Data used for Figure 6B-C.xlsx]

## Sheet: AUC Values
	T/F07	T/F07 H173Y	T/F07 △DSV	T/F07 H173Y+ △DSV	AE 244 tags	C.1086 tags	AE.T/F61	AE.T/F94	AE.T/F100	B.SF162	B.JRFL	A.BG505
T/F07	136509	105888	109703	82080	148177	148177	32260	32108	34171	34299	30517	29317
T/F07 H173Y	160805	161836	140580	145160	82294	136509	102939	102485	113823	120429	115900	105146
T/F07+ △DSV	106781	73709	71081	47282	146559	113823	33714	36966	35474	35047	32681	28968
T/F07 H173Y+ △DSV	128318	142680	107514	117362	108573	136509	92848	92647	107643	117696	98661	95792
Naive	24230	17320	26181	17813	17758	19248	19565	19248	22587	20218	17787	17040
