# Supplementary material for: A remarkable genetic shift in a transmitted/founder virus broadens antibody responses against HIV-1
Source: eLife journal article supplement (doi:10.7554/elife.92379), 2024-01-24
Supplement: fig6-data1 [file Data used for graphs in Figure 6D-E.xlsx]

## Sheet: CH59 blocked
	Unblocked	Unblocked	Unblocked	CH59 blocked	CH59 blocked	CH59 blocked
T/F07	0.8628	0.8707	0.8683	0.6028	0.6134	0.6202
H173Y	0.9526	0.9724	0.9618	0.9197	0.921	0.9226
△DSV	0.7876	0.8034	0.7913	0.3603	0.3611	0.3606
H173Y+ △DSV	0.8029	0.798	0.7974	0.7395	0.7288	0.7284
Naive	0.0478	0.0475	0.0467	0.0477	0.0471	0.0466

## Sheet: CH58 blocked
	Unblocked	Unblocked	Unblocked	CH59 blocked	CH59 blocked	CH59 blocked
T/F07	0.8628	0.8707	0.8683	0.6627	0.6355	0.625
H173Y	0.9526	0.9724	0.9618	0.9628	0.9248	0.9276
△DSV	0.7876	0.8034	0.7913	0.4002	0.3792	0.3735
H173Y+ △DSV	0.8029	0.798	0.7974	0.7489	0.7345	0.714
Naive	0.0478	0.0475	0.0467	0.0481	0.0469	0.0462
