# Supplementary material for: A remarkable genetic shift in a transmitted/founder virus broadens antibody responses against HIV-1
Source: eLife journal article supplement (doi:10.7554/elife.92379), 2024-01-24
Supplement: fig6-data1 [file Data used for graphs in Figure 6F-I.xlsx]

## Sheet: TF07
Dilution -1	Founder	Founder	D180A	D180A
100	2.34	2.3028	2.2456	2.2475
500	2.2483	2.2076	2.0422	1.9357
2500	1.8989	2.0807	1.4141	1.4598
12500	1.2879	1.2994	0.5566	0.5621
62500	0.4402	0.4424	0.1697	0.1685
312500	0.1377	0.1397	0.0743	0.0774

## Sheet: H173Y
Dilution -1	H173Y	H173Y	D180A	D180A
100	2.379	2.3077	2.3327	2.4462
500	2.2153	2.2735	2.1528	2.228
2500	2.0455	1.9997	2.0081	1.986
12500	1.3884	1.4299	1.2962	1.2998
62500	0.5467	0.5508	0.4638	0.464
312500	0.1716	0.1943	0.1297	0.1285

## Sheet: del.DSV
Dilution -1	△DSV	△DSV	D180A	D180A
100	2.5033	2.3445	2.2862	2.1741
500	2.1493	2.159	1.7786	1.7428
2500	1.513	1.5374	0.9067	0.9163
12500	0.6304	0.638	0.2818	0.2835
62500	0.1972	0.2033	0.0969	0.0985
312500	0.0825	0.0889	0.0558	0.0609

## Sheet: H173Y+del.DSV
Dilution -1	H173Y+△DSV	H173Y+△DSV	D180A	D180A
100	2.3106	2.2749	2.3969	2.264
500	2.1471	2.1856	2.1524	2.2236
2500	1.8495	1.8794	1.8914	1.8961
12500	1.0635	1.0757	1.1311	1.1387
62500	0.3907	0.3605	0.3842	0.3909
312500	0.1214	0.1279	0.131	0.1365
