# Supplementary material for: A remarkable genetic shift in a transmitted/founder virus broadens antibody responses against HIV-1
Source: eLife journal article supplement (doi:10.7554/elife.92379), 2024-01-24
Supplement: fig8-data1 [file Data used for graph in Figure 8F.xlsx]

## Sheet: Absorbance (OD650)
	Unblocked	Unblocked	CH58 Blocked	CH58 Blocked
T/F07	1.5891	1.5549	0.9798	0.9797
H173Y	1.262	1.2218	1.1494	1.1727
T/F07 lib.	1.2695	1.2387	0.8236	0.8383
H173Y lib.	1.5898	1.5199	1.5017	1.5165
H173Y + DSV lib.	1.4988	1.4547	1.3969	1.3988
H173Y + V1 lib.	1.2599	1.1971	0.9562	0.9653
gp16 scaffold	0.0538	0.0523	0.054	0.0533
Naive	0.063	0.0492	0.0488	0.05

## Sheet: Percent binding
	Unblocked	Unblocked	CH58 Blocked	CH58 Blocked
T/F07	100	100	61.65	63
H173Y	100	100	91	95.98
T/F07 lib.	100	100	64.87	67.67
H173Y lib.	100	100	94.35	99.77
H173Y + DSV lib.	100	100	93	96.15
H173Y + V1 lib.	100	100	75.89	80.63
