# Supplementary material for: A remarkable genetic shift in a transmitted/founder virus broadens antibody responses against HIV-1
Source: eLife journal article supplement (doi:10.7554/elife.92379), 2024-01-24
Supplement: fig8-data1 [file Data used for graphs in Figure 8C-E.xlsx]

## Sheet: PERCENT AUC VALUES
	1086	93TH75	CM235	T/F61	T/F94	M.Cons	16055	T/F100	96ZM651	MN	Bal	63521	AC10	BG505	CN54	JRFL	SF162	HIVIII	9021
T/F07	97	83.1	76.93	35.27	16.73	72.41	35.78	35	42.55	23.57	21.69	16.99	34.5	11.28	10.52	10.9	4.42	7.22	6
H173Y	89.26	56.7	32.9	57	17.95	100	72.75	69	70.74	69.89	62.1	41.2	36.74	29.4	15.11	13	8.7	13.29	9.7
T/F07lib.	70.9	60.8	62.44	49.74	35.6	71.46	41.4	54.5	26.98	47.79	44.1	15.71	18.75	16.27	11.96	9.44	5.7	6.83	5.88
H173Y lib.	20.65	47.9	30.83	18.24	22.64	66.5	73.4	60	34.45	21.47	20.25	8.5	21.88	17	5.83	7	5.11	4.12	3.71
H173Y+ DSV lib.	15.89	19.61	21.42	14	14.95	58.96	78.86	49.67	29	28.92	22.41	10	10.74	17.5	8.66	7.95	6.84	5.21	4.8
H173Y+ V1 lib.	50.76	57.76	38.55	46	17.88	100	35.11	76.7	79.73	49.87	41.32	14	13.52	61.55	13.97	9.05	7.58	6.36	6
Scaffold	3.5	3.5	3.5	3.5	3.5	3.5	3.5	3.5	3.5	3.5	3.5	3.5	3.5	3.5	3.5	3.5	3.5	3.5	3.5
Naive	3.5	3.5	3.5	3.5	3.5	3.5	3.5	3.5	3.5	3.5	3.5	3.5	3.5	3.5	3.5	3.5	3.5	3.5	3.5
