# Supplementary material for: A remarkable genetic shift in a transmitted/founder virus broadens antibody responses against HIV-1
Source: eLife. 2024 Apr 15;13:RP92379. doi: 10.7554/eLife.92379 (PMC11018346; doi:10.7554/eLife.92379)
Supplement: Figure 2—figure supplement 1—source data 1. [file elife-92379-fig2-figsupp1-data1.xlsx]

## Sheet: Sheet1
Site	PIN	Visit	Draw Date	days from 1st pos	APTIMA	Abbott RealTime HIV-1 RNA Log (Copies/ml)	Abbott RealTime HIV-1 RNA (Copies/ml)
TH	40007	A	2009-07-27	40021
	40007	B	2009-08-20	40045
	40007	D	2010-01-28	40206	NR
	40007	SBV	2010-02-15	40224	NR
	40007	SBV	2010-02-18	0	5.48
	40007	1	2010-02-20	40229	20.4	3.17	1479.11
	40007	2	2010-02-22	40231	27.15	4.21	16218.1
	40007	3	2010-02-26	40235	33.03	6.27	1.86209e+06
	40007	4	2010-03-01	40238	28.55	7.26	18197009
	40007	5	2010-03-05	40242	28.28	7.31	20465860
	40007	6	2010-03-09	40246	32.08	6.82	6.60693e+06
	40007	7	2010-03-11	40248	30.14	6.51	3.23594e+06
	40007	8	2010-03-16	40253	27.31	6.06	1.14815e+06
	40007	9	2010-03-19	40256	27.4	6.15	1.41254e+06
	40007	10	2010-03-24	40261		5.65	446684
	40007	11	2010-04-01	40269		5.61	407380
	40007	12	2010-04-09	40277		5.83	676083
	40007	13	2010-05-13	40311		5.52	331131
	40007	14	2010-08-02	40392		5.31	204174
	40007	15	2010-10-27	40478		4.91	81283.1
	40007	16	2011-01-17	40560		5.2	158489
	40007	17	2011-04-07	40640		4.6	39811
	40007	18	2011-08-04	40759		4.76	57544
	40007	19	2011-10-26	40842		5.83	676083
	40007	20	2012-01-19	40927		5.4	251189
	40007	21	2012-04-09	41008		4.81	64565
	40007	22	2012-07-17	41107		5.03	107152
	40007	23	2012-10-08	41190		5.01	102329
	40007	24	2012-12-24	41267		4.94	87096
	40007	25	2013-04-01	41365		4.98	95499
	40007	26	2013-05-20	41414		4.73601	54452
	40007	27	2013-08-13	41499		4.98495	96595
	40007	28	2013-11-21	41599		4.92125	83417
	40007	30	2014-05-23	41782		4.78076	60362
	40007	31	2014-07-28	41848		4.9271	84547
	40007	32	2014-10-13	41925		4.7956	62460
	40007	33	2014-12-22	41995		4.65417	45099
