# Supplementary material for: A remarkable genetic shift in a transmitted/founder virus broadens antibody responses against HIV-1
Source: eLife. 2024 Apr 15;13:RP92379. doi: 10.7554/eLife.92379 (PMC11018346; doi:10.7554/eLife.92379)
Supplement: Figure 4—source data 1. [file elife-92379-fig4-data1.xls]

## Sheet: CH65
Concentration ug/ml	T/F07	H173Y	H173Y+ △DSV	92TH023
0.048828	0.6	0.04	-0.73	-0.21
0.195313	0.27	-0.2	-1.8	0.81
0.78125	0.63	-0.26	-0.79	0.52
3.125	0.72	-0.09	-1.77	-0.47
12.5	0.17	0.35	-1.71	-0.32

## Sheet: CH58
Concentration ug/ml	T/F07	H173Y	H173Y+ △DSV	92TH023
0.048828	4.41	-0.62	-0.23	1.55
0.195313	5.92	0.46	0.51	1.85
0.78125	8.3	0.21	0.94	3.25
3.125	9	1.03	1.36	4.72
12.5	10.2	2.31	2.34	6.05

## Sheet: WEEK 0
Dilution-1	T/F07	H173Y	H173Y+ △DSV	92TH023
25600	1.53	-0.17	-2.26	-0.37
6400	0.82	0.06	-1.14	-0.99
1600	-0.25	-0.89	-1.36	-0.88
400	-0.23	-0.8	-1.87	-0.93
100	-0.22	-0.87	-1.86	-1.03
25	-0.9	-1.08	-1.58	-1.69

## Sheet: WEEK 4
Dilution-1	T/F07	H173Y	H173Y+ △DSV	92TH023
25600	0.41	0.03	-0.67	-0.18
6400	0.42	0.17	-1.63	-0.63
1600	2.77	2.17	1.15	2.15
400	8.3	7.33	5.89	6.15
100	8.5	8.33	4.54	6.15
25	4.19	4.49	0.8	3.26

## Sheet: WEEK 24
Dilution-1	T/F07	H173Y	H173Y+ △DSV	92TH023
25600	3.59	2.71	0.93	1.92
6400	8.3	6.93	3.45	9.25
1600	7.1	6.38	3.64	9.65
400	2	1.24	0.18	2.71
100	0.04	-0.31	-1.72	-0.36
25	-0.05	-1.46	-2.82	-2.37

## Sheet: CH65 AUC
T/F07	H173Y	H173Y+ △DSV	92TH023
6.081	1.305	0	0.7568

## Sheet: CH58 AUC
T/F07	H173Y	H173Y+ △DSV	92TH023
115.2	17.32	20.49	61.57

## Sheet: WEEK 0 AUC
T/F07	H173Y	H173Y+ △DSV	92TH023
1508	0	0	0

## Sheet: WEEK 4 AUC
T/F07	H173Y	H173Y+ △DSV	92TH023
25262	16066	7130	11169

## Sheet: WEEK 24 AUC
T/F07	H173Y	H173Y+ △DSV	92TH023
156564	129060	61356	160008
