# Supplementary material for: A remarkable genetic shift in a transmitted/founder virus broadens antibody responses against HIV-1
Source: eLife. 2024 Apr 15;13:RP92379. doi: 10.7554/eLife.92379 (PMC11018346; doi:10.7554/eLife.92379)
Supplement: Figure 5—source data 1. [file elife-92379-fig5-data1.xls]

## Sheet: T F07
	Pre	Pre	Pre	Pre	Post	Post	Post	Post	Pre	Pre	Pre	Pre	Post	Post	Post	Post	Pre	Pre	Pre	Pre	Post	Post	Post	Post	Pre	Pre	Pre	Pre	Post	Post	Post	Post	Pre	Pre	Pre	Pre	Post	Post	Post	Post	Pre	Pre	Pre	Pre	Post	Post	Post	Post
Mouse_1	0	0	0	0	0	0	0	0	0	0	0	0	556.51	504.21	557.31	505.91	0	0	0	0	0	0	0	0	0	0	0	0	201.28	176.58	206.48	181.58	0	0	0	0	0	0	0	0	0	0	0	0	0	0	0	0
Mouse_2	0	0	0	0	32.54	32.14	32.44	31.74	0	0	0	0	2024.21	1905.21	2024.21	1905.21	0	0	0	0	729.12	769.12	730.72	771.02	0	0	0	0	138.98	118.48	138.78	117.18	0	0	0	0	8.51	9.91	3.81	4.71	0	0	0	0	11.52	17.52	7.32	12.22
Mouse_3	0	0	0	0	242.94	238.94	244.74	239.74	0	0	0	0	971.21	879.31	968.21	877.51	0	0	0	0	285.02	298.92	285.62	300.32	0	0	0	0	568.78	526.58	596.58	555.88	0	0	0	0	235.61	245.11	235.61	245.81	0	0	0	0	231.92	194.12	233.02	195.92
Mouse_4	0	0	0	0	303.54	299.14	305.44	299.74	0	0	0	0	1499.21	1301.21	1498.21	1300.21	0	0	0	0	889.72	949.72	890.72	948.72	0	0	0	0	338.38	297.68	327.68	287.18	0	0	0	0	259.21	270.21	257.21	266.21	0	0	0	0	263.22	237.92	259.92	234.82
Mouse_5	0	0	0	0	283.14	278.14	283.24	276.34	0	0	0	0	751.01	631.01	745.91	626.61	0	0	0	0	297.22	311.52	298.72	311.82	0	0	0	0	525.88	453.58	523.48	451.28	0	0	0	0	261.61	270.11	261.81	270.61	0	0	0	0	260.62	223.92	261.02	223.32
Mouse_6	0	0	0	0	73.44	69.74	70.44	66.74	0	0	0	0	1774.21	1657.21	1772.21	1657.21	0	0	0	0	612.52	645.12	610.72	643.12	0	0	0	0	784.18	706.78	777.28	697.98	0	0	0	0	939.81	970.81	932.81	962.81	0	0	0	0	836.32	772.82	829.22	764.92

## Sheet: H173Y
	Pre	Pre	Pre	Pre	Post	Post	Post	Post	Pre	Pre	Pre	Pre	Post	Post	Post	Post	Pre	Pre	Pre	Pre	Post	Post	Post	Post	Pre	Pre	Pre	Pre	Post	Post	Post	Post	Pre	Pre	Pre	Pre	Post	Post	Post	Post	Pre	Pre	Pre	Pre	Post	Post	Post	Post
Mouse_1	0	0	0	0	501.54	497.64	508.54	505.94	0	0	0	0	565.01	502.71	571.91	511.11	0	0	0	0	400.92	427.22	406.22	432.92	0	0	0	0	505.28	447.88	511.18	453.28	0	0	0	0	448.11	469.61	459.71	479.01	0	0	0	0	452.92	401.92	459.42	409.02
Mouse_2	0	0	0	0	413.14	404.94	414.04	405.64	0	0.31	0	1.31	517.51	477.31	518.21	478.61	0	0	1.42	0.12	457.12	491.52	462.12	492.82	0	0	0	0	377.38	349.88	376.68	348.48	0	0	0	0	368.11	379.21	368.41	379.01	0	0	0	0	369.72	346.02	368.52	345.52
Mouse_3
Mouse_4	2.04	0	3.44	0	556.24	551.34	555.04	547.94	1.31	2.01	2.71	3.11	595.01	531.21	594.11	528.81	1.02	0	2.22	1.12	444.92	469.12	442.52	466.42	0	0	0	0	526.88	469.08	522.58	464.78	0.71	0	0.01	0	515.41	532.41	516.61	533.11	0	0	0	0	514.52	463.42	514.22	463.02
Mouse_5	2.24	0	1.34	0	366.64	360.24	368.44	361.64	0.31	1.71	0	0.81	398.21	353.71	399.61	354.91	3.92	2.72	3.52	2.52	292.82	309.22	294.72	311.92	0	0	0	0	611.88	558.18	619.18	564.58	0	0	0	0	323.01	335.51	329.91	340.11	0	0	0	0	326.52	293.02	330.62	294.52
Mouse_6	11.24	6.74	8.34	2.84	1087.54	1092.54	1097.54	1100.54	9.81	10.91	6.51	7.51	1279.21	1142.21	1285.21	1148.21	19.12	19.52	18.62	18.62	926.72	999.72	929.72	1002.72	13.28	11.38	11.48	9.18	1018.88	888.88	1022.88	893.88	11.31	10.01	7.91	6.01	1005.81	1044.81	1014.81	1054.81	15.22	12.62	8.52	7.42	992.82	874.82	1001.82	883.82
H173Y group mouse 3 sera was not enough for this experiment.

## Sheet: del.DSV
	Pre	Pre	Pre	Pre	Post	Post	Post	Post	Pre	Pre	Pre	Pre	Post	Post	Post	Post	Pre	Pre	Pre	Pre	Post	Post	Post	Post	Pre	Pre	Pre	Pre	Post	Post	Post	Post	Pre	Pre	Pre	Pre	Post	Post	Post	Post	Pre	Pre	Pre	Pre	Post	Post	Post	Post
Mouse_1	46.64	35.24	39.64	29.14	1692.54	1696.54	1708.54	1710.54	25.21	31.11	20.81	25.61	2101.21	1921.21	2106.21	1931.21	20.82	10.02	14.42	3.42	1621.72	1693.72	1634.72	1702.72	28.48	28.48	23.18	22.88	1816.88	1681.88	1825.88	1694.88	48.91	43.71	41.01	44.21	1651.81	1695.81	1667.81	1709.81	54.52	51.22	47.22	44.62	1658.82	1547.82	1672.82	1566.82
Mouse_2	23.94	14.74	23.34	14.54	1490.54	1503.54	1492.54	1505.54	6.11	10.41	6.01	11.21	1929.21	1695.21	1930.21	1699.21	0	0	0	0	1625.72	1713.72	1623.72	1710.72	11.28	10.48	8.88	8.18	1961.88	1822.88	1960.88	1824.88	25.21	21.11	23.91	20.31	1231.81	1279.81	1231.81	1278.81	31.02	28.52	29.72	26.12	1248.82	1104.82	1248.82	1103.82
Mouse_3	28.94	20.04	28.64	18.94	1590.54	1598.54	1587.54	1595.54	9.51	14.21	9.51	14.71	1942.21	1772.21	1938.21	1769.21	2.72	0	2.12	0	1569.72	1643.72	1561.72	1637.72	13.38	13.28	11.28	10.78	1611.88	1451.88	1604.88	1443.88	30.61	27.41	29.91	25.71	1547.81	1596.81	1543.81	1591.81	36.22	33.12	34.92	30.72	1569.82	1438.82	1565.82	1439.82
Mouse_4	32.74	23.54	31.54	23.14	1357.54	1350.54	1360.54	1354.54	16.51	21.91	15.31	20.81	1969.21	1842.21	1961.21	1843.21	7.62	0	8.52	0	1564.72	1638.72	1564.72	1640.72	19.58	18.58	19.98	19.08	1533.88	1417.88	1536.88	1419.88	35.01	32.01	36.21	33.11	1324.81	1359.81	1328.81	1363.81	42.42	39.32	42.92	39.72	1335.82	1249.82	1341.82	1255.82
Mouse_5	18.94	12.24	21.64	12.44	657.64	644.64	646.94	633.94	2.21	6.81	4.61	8.71	1742.21	1545.21	1735.21	1537.21	0	0	0	0	1019.72	1074.72	1011.72	1066.72	7.18	6.18	8.28	6.58	690.28	608.28	683.28	602.48	21.01	17.81	23.41	19.91	647.51	664.41	635.71	651.91	29.22	24.92	29.92	25.42	688.02	624.52	678.92	614.32
Mouse_6	32.84	23.84	33.34	23.54	1786.54	1795.54	1785.54	1795.54	14.31	19.51	14.31	18.71	2258.21	2104.21	2256.21	2102.21	7.42	0	9.22	0	1832.72	1922.72	1831.72	1920.72	18.68	17.38	19.18	18.58	1885.88	1743.88	1884.88	1743.88	34.41	31.41	38.51	34.61	1753.81	1802.81	1751.81	1799.81	40.82	36.42	43.32	39.32	1763.82	1662.82	1760.82	1659.82

## Sheet: H173Y+del.DSV
	Pre	Pre	Pre	Pre	Post	Post	Post	Post	Pre	Pre	Pre	Pre	Post	Post	Post	Post	Pre	Pre	Pre	Pre	Post	Post	Post	Post	Pre	Pre	Pre	Pre	Post	Post	Post	Post	Pre	Pre	Pre	Pre	Post	Post	Post	Post	Pre	Pre	Pre	Pre	Post	Post	Post	Post
Mouse_1	0	0	0	0	985.54	975.54	988.54	975.54	0	0	0	0	1124.21	1020.21	1120.21	1016.21	0	0	0	0	891.72	935.72	887.72	930.72	0	0	0	0	980.88	901.88	975.88	896.88	0	0	0	0	877.91	902.81	874.11	898.81	0	0	0	0	868.22	811.82	863.72	807.22
Mouse_2	0	0	0	0	579.94	576.04	574.84	570.74	0	0	0	0	1616.21	1414.21	1606.21	1405.21	0	0	0	0	1205.72	1292.72	1212.72	1297.72	0	0	0	0	1079.88	982.88	1075.88	979.88	0	0	0	0	575.21	596.31	573.41	594.81	0	0	0	0	571.02	485.62	569.52	482.72
Mouse_3	0	0	0	0	825.14	823.04	829.84	824.34	0	0	0	0	967.21	857.21	968.21	860.31	0	0	0	0	825.42	872.72	826.72	871.72	0	0	0	0	854.18	757.38	866.78	769.48	0	0	0	0	820.31	851.81	829.21	859.31	0	0	0	0	816.82	729.52	823.72	738.02
Mouse_4	0	0	0	0	256.14	249.84	254.04	246.14	0	0	0	0	1276.21	1144.21	1274.21	1144.21	0	0	0	0	951.72	1016.72	950.72	1015.72	0	0	0	0	713.88	623.48	708.48	617.58	0	0	0	0	568.61	584.01	565.41	580.91	0	0	0	0	565.02	518.02	562.32	516.12
Mouse_5	0	0	0	0	137.84	131.84	134.04	127.94	0	0	0	0	1837.21	1613.21	1831.21	1608.21	0	0	0	0	1234.72	1319.72	1228.72	1313.72	0	0	0	0	1158.88	1005.88	1151.88	997.88	0	0	0	0	197.71	214.91	184.91	200.81	0	0	0	0	1519.82	1496.82	1507.82	1485.82
Mouse_6	0	0	0	0	296.64	283.14	295.94	283.44	0	0	0	0	1228.21	1116.21	1223.21	1110.21	0	0	0	0	1026.72	1095.72	1023.72	1090.72	0	0	0	0	470.58	425.18	465.78	420.78	0	0	0	0	297.91	299.71	298.81	300.21	0	0	0	0	308.22	278.92	305.02	275.72
