# Supplementary material for: A remarkable genetic shift in a transmitted/founder virus broadens antibody responses against HIV-1
Source: eLife. 2024 Apr 15;13:RP92379. doi: 10.7554/eLife.92379 (PMC11018346; doi:10.7554/eLife.92379)
Supplement: Figure 6—figure supplement 1—source data 1. [file elife-92379-fig6-figsupp1-data1.xlsx]

## Sheet: NAIVE
Dilution -1	T/F07	T/F07	T/F07 H173Y	T/F07 H173Y	T/F07 dDSV	T/F07 dDSV	T/F07 H173Y+ dDSV	T/F07 H173Y+ dDSV	T/F61	T/F61	T/F94	T/F94	T/F100	T/F100	SF162	SF162	AE 244 TAGS	AE 244 TAGS	C.1086 TAGS	C.1086 TAGS	JRFL	JRFL	BG505	BG505
100	0.2106	0.2351	0.2429	0.2491	0.2517	0.2491	0.1932	0.1905	0.1753	0.1906	0.1342	0.128	0.1496	0.1451	0.1791	0.1748	0.1423	0.141	0.1621	0.158	0.1444	0.1529	0.2783	0.271
500	0.2606	0.1161	0.117	0.119	0.1317	0.129	0.0975	0.098	0.0966	0.093	0.075	0.0746	0.0826	0.0861	0.0976	0.0982	0.0862	0.0801	0.0889	0.0911	0.092	0.0862	0.1228	0.1309
2500	0.0739	0.0743	0.0675	0.0662	0.081	0.0841	0.0673	0.0713	0.0673	0.0679	0.058	0.0626	0.0669	0.0672	0.0775	0.0704	0.0568	0.0597	0.0664	0.0621	0.0653	0.0684	0.0774	0.0783
12500	0.0589	0.0568	0.0566	0.0547	0.0616	0.0613	0.0605	0.0597	0.0577	0.0555	0.0623	0.0509	0.0564	0.0557	0.0596	0.0685	0.052	0.0511	0.0565	0.0544	0.0541	0.073	0.0604	0.0594
62500	0.049	0.0532	0.0533	0.0482	0.0534	0.0565	0.0524	0.0471	0.0535	0.0494	0.0469	0.0458	0.0516	0.0505	0.0539	0.052	0.0476	0.0532	0.053	0.0568	0.0555	0.0515	0.0513	0.0522
312500	0.0512	0.0482	0.052	0.0478	0.0609	0.0516	0.0514	0.0531	0.0518	0.0529	0.0495	0.0433	0.0499	0.0488	0.0785	0.056	0.048	0.0474	0.0841	0.0479	0.0484	0.0504	0.0493	0.0513

## Sheet: TF07
Dilution -1	T/F07	T/F07	T/F07 H173Y	T/F07 H173Y	T/F07 dDSV	T/F07 dDSV	T/F07 H173Y+ dDSV	T/F07 H173Y+ dDSV	T/F61	T/F61	T/F94	T/F94	T/F100	T/F100	SF162	SF162	AE 244 TAGS	AE 244 TAGS	C.1086 TAGS	C.1086 TAGS	JRFL GNTI	JRFL GNTI	BG505	BG505
100	2.1596	2.1466	2.0102	2.02	2.1616	2.1179	2.0934	2.0717	2.0243	1.9711	2.0222	1.9793	1.9308	1.8799	1.5654	1.4964	2.3074	2.2685	2.2544	2.2427	1.5297	1.5647	1.2767	1.3259
500	2.0803	2.0042	1.7846	1.77	1.9487	1.9387	1.8506	1.8771	1.4251	1.4304	1.4542	1.4611	1.2401	1.2484	0.7896	0.7651	2.13	2.1749	2.1665	2.131	0.782	0.823	0.5526	0.5206
2500	1.7166	1.7136	1.1189	1.1117	1.4725	1.4803	1.2846	1.2867	0.6437	0.6373	0.6431	0.6549	0.4761	0.4899	0.2747	0.2772	1.85	1.8424	1.8384	1.834	0.2929	0.2868	0.1972	0.1796
12500	0.9383	0.906	0.39	0.3922	0.652	0.6529	0.4762	0.4858	0.1966	0.1983	0.1947	0.1947	0.1529	0.1508	0.1024	0.1018	1.0488	1.0466	1.0377	1.0475	0.1194	0.1089	0.086	0.0821
62500	0.2935	0.2913	0.1245	0.1265	0.2	0.2005	0.1513	0.1516	0.0814	0.0819	0.0868	0.0831	0.069	0.0717	0.0608	0.069	0.3414	0.3389	0.3529	0.3398	0.0666	0.0673	0.0619	0.0624
312500	0.1027	0.1088	0.0628	0.0674	0.0817	0.0841	0.0755	0.0762	0.0574	0.0645	0.0613	0.0571	0.054	0.0565	0.0565	0.0609	0.1191	0.1224	0.115	0.1209	0.0532	0.0528	0.0595	0.048

## Sheet: H173Y
Dilution -1	T/F07	T/F07	T/F07 H173Y	T/F07 H173Y	T/F07 dDSV	T/F07 dDSV	T/F07 H173Y+ dDSV	T/F07 H173Y+ dDSV	T/F61	T/F61	T/F94	T/F94	T/F100	T/F100	SF162	SF162	AE 244 TAGS	AE 244 TAGS	C.1086 TAGS	C.1086 TAGS	JRFL	JRFL	BG505	BG505
100	2.1063	2.0623	1.9969	1.9825	1.9793	2.0313	2.0333	2.0336	1.8899	1.9277	1.8506	1.8363	1.8844	1.8604	2.0016	1.9206	2.1336	2.1715	2.1216	2.2116	2.0268	2.0099	1.7939	1.7971
500	1.9899	1.9719	1.8864	1.8509	1.9499	1.9035	1.9695	1.9841	1.556	1.5821	1.5533	1.5843	1.4718	1.4977	1.732	1.7977	1.7471	1.7517	2.1133	2.1078	1.9293	1.9262	1.2171	1.1843
2500	1.6953	1.7458	1.5684	1.5545	1.6529	1.6756	1.7345	1.7299	0.8513	0.8665	1.0351	1.0515	0.8149	0.8325	1.3053	1.327	0.9379	0.9736	1.7307	1.7394	1.471	1.4634	0.5731	0.5471
12500	1.0802	1.0719	0.8238	0.8116	0.9503	0.9226	0.993	1.0443	0.299	0.3015	0.3958	0.3966	0.2882	0.2901	0.5656	0.5569	0.3087	0.3	0.9539	0.9258	0.693	0.6592	0.1947	0.1944
62500	0.3846	0.3803	0.267	0.27	0.3235	0.3171	0.3511	0.3572	0.1067	0.1108	0.1358	0.1289	0.1039	0.0985	0.1787	0.1762	0.1008	0.1007	0.304	0.2973	0.2852	0.2806	0.0861	0.0819
312500	0.1437	0.1425	0.0963	0.1001	0.1098	0.1111	0.1179	0.122	0.0608	0.0659	0.0642	0.0711	0.0612	0.0579	0.0785	0.0763	0.0541	0.0584	0.1052	0.1062	0.1209	0.114	0.0571	0.0545

## Sheet: del.DSV
Dilution -1	T/F07	T/F07	T/F07 H173Y	T/F07 H173Y	T/F07 dDSV	T/F07 dDSV	T/F07 H173Y+ dDSV	T/F07 H173Y+ dDSV	T/F61	T/F61	T/F94	T/F94	T/F100	T/F100	SF162	SF162	C.1086	C.1086	AE 244 TAGS	AE 244 TAGS	C.1086 TAGS	C.1086 TAGS	JRFL	JRFL	BG505	BG505
100	2.08	2.1263	1.8794	1.8843	2.026	2.0619	2.01	2.013	2.0902	1.9947	2.0004	1.9664	1.6974	1.8001	1.4501	1.3768	2.0053	2.1046	2.1792	2.1686	2.2069	2.1323	1.3256	1.3045	0.8391	0.8821
500	2.0091	1.9369	1.386	1.3921	1.8196	1.8048	1.6293	1.597	1.5394	1.5288	1.3814	1.3678	1.1208	1.0955	0.7546	0.7251	1.8321	1.8151	2.0995	2.1068	2.0156	2.0163	0.7307	0.7708	0.3163	0.2926
2500	1.5387	1.5445	0.6347	0.6383	1.1851	1.1842	0.8209	0.8383	0.6595	0.6784	0.5651	0.5785	0.4081	0.3976	0.2777	0.2805	1.1487	1.1523	1.708	1.7163	1.592	1.5686	0.2852	0.2806	0.1192	0.1162
12500	0.7639	0.7704	0.2201	0.2192	0.472	0.4641	0.2694	0.271	0.2051	0.2042	0.1812	0.1774	0.1307	0.1287	0.1065	0.1065	0.435	0.4361	0.9081	0.9273	0.7949	0.789	0.1209	0.114	0.0666	0.0648
62500	0.2342	0.233	0.0836	0.0836	0.146	0.1512	0.0968	0.1266	0.0791	0.0795	0.0718	0.0757	0.0667	0.0643	0.0587	0.0616	0.1283	0.1337	0.2872	0.2866	0.2483	0.2456	0.0678	0.0729	0.0628	0.0634
312500	0.0938	0.0951	0.056	0.0598	0.0706	0.0729	0.057	0.0722	0.0541	0.0561	0.0517	0.0526	0.0499	0.0546	0.0516	0.0598	0.063	0.0624	0.0976	0.1009	0.0902	0.0893	0.0519	0.053	0.0469	0.0513

## Sheet: H173Y+del.DSV
Dilution -1	T/F07	T/F07	T/F07 H173Y	T/F07 H173Y	T/F07 dDSV	T/F07 dDSV	T/F07 H173Y+ dDSV	T/F07 H173Y+ dDSV	T/F61	T/F61	T/F94	T/F94	T/F100	T/F100	SF162	SF162	C.1086	C.1086	AE 244 TAGS	AE 244 TAGS	C.1086 TAGS	C.1086 TAGS	JRFL	JRFL	BG505	BG505
100	2.1429	2.1538	2.0997	2.0787	2.2185	2.1532	2.2305	2.1825	1.9093	1.9279	1.9931	1.9708	2.0531	2.016	1.8637	1.8121	2.1009	2.1867	2.345	2.3247	2.4087	2.3524	1.9486	1.905	1.9947	1.935
500	1.9803	1.963	1.888	1.8284	1.9584	1.9217	2.0191	2.0309	1.4315	1.4183	1.5777	1.6017	1.6417	1.662	1.5365	1.5391	1.7791	1.7914	2.1967	2.117	2.1806	2.1874	1.7631	1.7163	1.5032	1.4909
2500	1.5031	1.5162	1.2345	1.1964	1.3654	1.3595	1.488	1.4774	0.6659	0.6507	0.8707	0.8781	0.8817	0.8835	0.9224	0.9532	0.9219	0.937	1.5975	1.6247	1.6415	1.6487	1.2917	1.2757	0.6878	0.7326
12500	0.7182	0.7293	0.4708	0.4708	0.5702	0.5692	0.6676	0.6658	0.2102	0.2082	0.288	0.2948	0.2921	0.307	0.3312	0.3443	0.2832	0.2893	0.68	0.6845	0.7595	0.7357	0.5485	0.5834	0.227	0.2136
62500	0.2312	0.2323	0.1436	0.1482	0.1806	0.1837	0.2133	0.217	0.086	0.0788	0.0989	0.0999	0.1002	0.0969	0.1105	0.1261	0.0974	0.0997	0.2067	0.2099	0.2285	0.2252	0.1823	0.1824	0.0892	0.0971
312500	0.0899	0.0945	0.0642	0.0725	0.0725	0.0796	0.081	0.0883	0.0501	0.0536	0.0525	0.0552	0.0535	0.0569	0.0573	0.0674	0.0557	0.0591	0.0781	0.0888	0.0866	0.0909	0.081	0.0834	0.0521	0.0598
