# Supplementary material for: A remarkable genetic shift in a transmitted/founder virus broadens antibody responses against HIV-1
Source: eLife. 2024 Apr 15;13:RP92379. doi: 10.7554/eLife.92379 (PMC11018346; doi:10.7554/eLife.92379)
Supplement: Figure 8—figure supplement 4—source data 1. [file elife-92379-fig8-figsupp4-data1.xlsx]

## Sheet: NAIVE
DILUTION -1			AE244 tags	AE244 tags	CN54	CN54	BG505	BG505	JRFL	JRFL	M.Cons	M.Cons	AC10	AC10	96ZM651	96ZM651	HIVIII	HIVIII	9021	9021	63521	63521	1086	1086	Autologous	Autologous	93TH75	93TH75	1086 tags	1086 tags	Bal	Bal	MN	MN	ZM249 tags	ZM249 tags	16055	16055	CM235	CM235	T/F61	T/F61	T/F94	T/F94	T/F100	T/F100	SF162	SF162
100			0.0613		0.0875		0.0951		0.0846		0.0639		0.0898		0.072		0.0856		0.0655		0.0657		0.0727		0.0884		0.075		0.0522		0.0719		0.049		0.079		0.0906		0.0868		0.0777		0.0868		0.0784		0.0885
500			0.0529	0.051	0.0619	0.0599	0.0629	0.0619	0.0598	0.0594	0.0518	0.0543	0.0711	0.0604	0.0598	0.0587	0.0656	0.0657	0.0553	0.0584	0.0545	0.0546	0.0557	0.0603	0.0577	0.057	0.0471	0.0485	0.0415	0.0421	0.0477	0.0457	0.04	0.0408	0.0483	0.0496	0.0562	0.0549	0.0529	0.0527	0.0524	0.0494	0.0533	0.0534	0.0504	0.0512	0.0541	0.056
2500			0.057	0.0578	0.0688	0.068	0.0662	0.0736	0.0665	0.0662	0.0673	0.0626	0.0651	0.0648	0.0676	0.0685	0.0717	0.0717	0.0669	0.0679	0.0682	0.0689	0.0711	0.0779	0.0463	0.0475	0.0422	0.0431	0.0403	0.0403	0.0409	0.0416	0.039	0.0422	0.0438	0.0442	0.0482	0.0476	0.0457	0.0454	0.0438	0.045	0.0455	0.0479	0.0443	0.0456	0.0487	0.0495
12500			0.0476	0.0479	0.0524	0.0511	0.0504	0.0512	0.0518	0.0511	0.0494	0.0516	0.0508	0.0555	0.0508	0.0521	0.0549	0.0537	0.0504	0.0513	0.0505	0.0522	0.0511	0.055	0.0422	0.0415	0.0405	0.0403	0.0389	0.0394	0.0396	0.0392	0.0378	0.0403	0.0394	0.0421	0.0424	0.0448	0.0409	0.0415	0.0414	0.041	0.0417	0.0425	0.041	0.0414	0.0433	0.0424
	The assay was performed in duplicates except for lowest dilution (1:100) due to limitation of mice sera for all the groups.

## Sheet: GP16 SCAFFOLD
DILUTION -1			AE244 tags	AE244 tags	CN54	CN54	BG505	BG505	JRFL	JRFL	M.Cons	M.Cons	AC10	AC10	96ZM651	96ZM651	HIVIII	HIVIII	9021	9021	63521	63521	1086	1086	Autologous	Autologous	93TH75	93TH75	1086 tags	1086 tags	Bal	Bal	MN	MN	ZM249 tags	ZM249 tags	16055	16055	CM235	CM235	T/F61	T/F61	T/F94	T/F94	T/F100	T/F100	SF162	SF162
100			0.1412		0.0856		0.1098		0.0991		0.0712		0.0964		0.0776		0.094		0.0695		0.07		0.069		0.0978		0.0716		0.0741		0.0656		0.0515		1.7002		0.1133		0.0918		0.0994		0.1071		0.1003		0.1246
500			0.0698	0.0693	0.0614	0.0611	0.0695	0.0687	0.0647	0.0646	0.0541	0.0565	0.0703	0.0653	0.0628	0.0628	0.0711	0.0694	0.0569	0.0557	0.0573	0.0586	0.0668	0.0666	0.0662	0.0601	0.0503	0.0487	0.0469	0.0473	0.0472	0.0603	0.0423	0.043	1.0238	1.043	0.0648	0.0649	0.056	0.0549	0.0574	0.0563	0.0622	0.0622	0.0564	0.0568	0.0653	0.0687
2500			0.0631	0.0629	0.0697	0.0696	0.0709	0.0721	0.0697	0.0687	0.0632	0.0673	0.0713	0.0725	0.0725	0.0711	0.0746	0.0727	0.0676	0.0661	0.0677	0.0699	0.0785	0.0772	0.0491	0.0491	0.0451	0.0455	0.0436	0.0431	0.0426	0.0436	0.0404	0.0417	0.3662	0.3953	0.053	0.0515	0.0488	0.0486	0.049	0.0488	0.05	0.0514	0.0481	0.0481	0.0546	0.0551
12500			0.0503	0.0513	0.0546	0.0535	0.055	0.0537	0.0519	0.0532	0.0507	0.0515	0.0639	0.0587	0.0582	0.0602	0.0616	0.0599	0.0583	0.0554	0.0585	0.0574	0.0623	0.0682	0.0444	0.0425	0.0402	0.0428	0.0403	0.0396	0.0409	0.0414	0.0394	0.0388	0.1158	0.1179	0.0423	0.042	0.0408	0.0414	0.04	0.0404	0.0399	0.0408	0.0508	0.0401	0.0422	0.0434

## Sheet: TF07
DILUTION -1			AE244 tags	AE244 tags	CN54	CN54	BG505	BG505	JRFL	JRFL	M.Cons	M.Cons	AC10	AC10	96ZM651	96ZM651	HIVIII	HIVIII	9021	9021	63521	63521	1086	1086	Autologous	Autologous	93TH75	93TH75	1086 tags	1086 tags	Bal	Bal	MN	MN	ZM249 tags	ZM249 tags	16055	16055	CM235	CM235	T/F61	T/F61	T/F94	T/F94	T/F100	T/F100	SF162	SF162
100			2.3124		0.7815		0.8937		0.8068		2.1476		1.9371		2.0035		0.3011		0.1927		1.3128		2.281		2.2415		2.0851		2.2243		1.515		1.6		2.1585		1.9761		2.1424		1.9464		1.4257		1.8464		0.1668
500			2.2725	2.3281	0.2878	0.2929	0.325	0.3174	0.3044	0.316	1.8279	1.8911	1.2215	1.1882	1.388	1.4057	0.1366	0.1392	0.0988	0.0992	0.5759	0.5898	2.0372	2.1266	2.0905	1.9893	1.9052	1.8692	2.0817	2.0568	0.8002	0.7821	0.87	0.8899	1.9532	2.0402	1.2763	1.1723	1.8288	1.836	1.1959	1.2453	0.6006	0.5895	1.1678	1.2161	0.0746	0.0797
2500			1.9765	1.9703	0.1367	0.1344	0.1422	0.1445	0.139	0.1406	1.1027	1.1247	0.4845	0.461	0.6044	0.6054	0.0987	0.0998	0.0865	0.0866	0.2111	0.2154	1.4366	1.5593	1.5333	1.5314	1.2855	1.2886	1.687	1.6597	0.2778	0.2791	0.2998	0.3081	1.3669	1.4013	0.5106	0.485	1.182	1.177	0.4871	0.4807	0.2044	0.2024	0.4764	0.4991	0.0556	0.0545
12500			1.2549	1.25	0.0651	0.0662	0.0675	0.0688	0.0667	0.0686	0.3945	0.3986	0.1491	0.1419	0.1915	0.1885	0.0616	0.0615	0.0544	0.0555	0.0808	0.0859	0.6204	0.6745	0.7138	0.708	0.5221	0.5123	0.9133	0.9037	0.094	0.0943	0.0966	0.0989	0.5357	0.5502	0.1545	0.1439	0.4641	0.4677	0.1548	0.1493	0.0775	0.082	0.1469	0.1539	0.046	0.0484

## Sheet: H173Y
DILUTION -1			AE244 tags	AE244 tags	CN54	CN54	BG505	BG505	JRFL	JRFL	M.Cons	M.Cons	AC10	AC10	96ZM651	96ZM651	HIVIII	HIVIII	9021	9021	63521	63521	1086	1086	Autologous	Autologous	93TH75	93TH75	1086 tags	1086 tags	Bal	Bal	MN	MN	ZM249 tags	ZM249 tags	16055	16055	CM235	CM235	T/F61	T/F61	T/F94	T/F94	T/F100	T/F100	SF162	SF162
100			2.1545		0.7815		1.3298		0.5286		2.1568		1.5259		1.9125		0.5342		0.2964		1.5755		2.0071		2.0721		1.7673		2.1925		1.7501		1.8025		2.0568		1.9222		1.494		1.7863		0.9683		1.8514		0.2711
500			1.6682	1.6737	0.2984	0.2963	0.66	0.6641	0.2299	0.2297	1.9512	1.9933	0.8745	0.8502	1.445	1.459	0.2413	0.2436	0.1471	0.1471	0.8736	0.8804	1.5924	1.6679	1.7357	1.6823	1.2215	1.2154	2.0796	2.0438	1.2712	1.2901	1.3857	1.4058	1.6382	1.6503	1.506	1.4502	0.7965	0.807	1.2342	1.2324	0.4049	0.4226	1.4013	1.421	0.1336	0.1385
2500			0.8356	0.8446	0.1338	0.1272	0.2599	0.2633	0.1189	0.1135	1.3968	1.4355	0.3312	0.3203	0.6868	0.713	0.1137	0.1167	0.0883	0.0866	0.3985	0.3784	0.8769	0.9404	1.0631	1.0201	0.5532	0.5522	1.7983	1.7904	0.603	0.622	0.6999	0.7113	0.8743	0.9024	0.7395	0.7083	0.2902	0.2865	0.5562	0.5514	0.1484	0.1489	0.69	0.6883	0.0769	0.0784
12500			0.2716	0.2791	0.062	0.0614	0.0985	0.0984	0.0598	0.0621	0.6277	0.6432	0.1241	0.1187	0.2298	0.2451	0.0642	0.0651	0.0556	0.0532	0.1384	0.1324	0.3228	0.3445	0.3876	0.3753	0.1777	0.1781	1.1105	1.1064	0.2027	0.2097	0.2272	0.2337	0.3054	0.3203	0.2497	0.2397	0.1008	0.1021	0.1782	0.18	0.0639	0.0655	0.22	0.2268	0.0472	0.0497

## Sheet: TF07 LIB.
DILUTION -1			AE244 tags	AE244 tags	CN54	CN54	BG505	BG505	JRFL	JRFL	M.Cons	M.Cons	AC10	AC10	96ZM651	96ZM651	HIVIII	HIVIII	9021	9021	63521	63521	1086	1086	Autologous	Autologous	93TH75	93TH75	1086 tags	1086 tags	Bal	Bal	MN	MN	ZM249 tags	ZM249 tags	16055	16055	CM235	CM235	T/F61	T/F61	T/F94	T/F94	T/F100	T/F100	SF162	SF162
100			2.3079		0.9162		1.3144		0.6055		2.2111		1.4141		1.6151		0.3841		0.2724		1.2306		2.0756		2.3831		2.1821		2.3806		2.0052		2.1029		2.2421		2.0814		2.2196		2.1582		2.0058		2.1997		0.3199
500			2.1883	2.2389	0.3407	0.3608	0.5665	0.5676	0.2482	0.2518	1.8526	1.9396	0.7156	0.6792	0.966	0.979	0.155	0.1629	0.1254	0.1253	0.5392	0.58	1.7576	1.8253	2.1942	2.1253	1.77	1.7404	2.3638	2.3168	1.4303	1.4476	1.5768	1.5959	2.0234	2.1396	1.4637	1.3662	1.7877	1.7802	1.5236	1.6115	1.2336	1.2365	1.5814	1.6705	0.1255	0.1374
2500			1.7852	1.7441	0.1543	0.16	0.2034	0.2081	0.1237	0.1214	1.1012	1.1677	0.2448	0.2352	0.3646	0.3752	0.0886	0.09	0.0784	0.0802	0.1978	0.2035	1.0783	1.1527	1.6255	1.5733	0.9614	0.9364	2.1418	2.1823	0.6606	0.6499	0.7024	0.7263	1.4169	1.4557	0.6047	0.5796	0.9636	0.9611	0.7661	0.7263	0.5059	0.5009	0.7926	0.8653	0.0699	0.0727
12500			0.9039	0.8769	0.072	0.0742	0.0819	0.0878	0.0687	0.0724	0.3859	0.3738	0.0901	0.0854	0.1196	0.1217	0.0569	0.0584	0.0512	0.0528	0.077	0.079	0.4018	0.4326	0.689	0.6383	0.3071	0.288	1.5679	1.5495	0.1994	0.1968	0.2004	0.2112	0.5641	0.5883	0.1924	0.1874	0.3256	0.3228	0.2406	0.2234	0.1566	0.1585	0.2509	0.2874	0.0542	0.0524

## Sheet: H173Y LIB.
DILUTION -1			AE244 tags	AE244 tags	CN54	CN54	BG505	BG505	JRFL	JRFL	M.Cons	M.Cons	AC10	AC10	96ZM651	96ZM651	HIVIII	HIVIII	9021	9021	63521	63521	1086	1086	Autologous	Autologous	93TH75	93TH75	1086 tags	1086 tags	Bal	Bal	MN	MN	ZM249 tags	ZM249 tags	16055	16055	CM235	CM235	T/F61	T/F61	T/F94	T/F94	T/F100	T/F100	SF162	SF162
100			2.2606		0.41		1.54		0.4886		2.3011		1.773		1.9028		0.1572		0.1136		0.8367		1.585		2.3814		2.1564		2.3836		1.6454		1.7467		2.3423		2.3741		1.9609		1.6093		1.7216		2.2954		0.3763
500			2.0537	2.0208	0.1762	0.175	0.7497	0.7451	0.212	0.2321	1.97	1.9792	1.0355	0.99	1.3424	1.338	0.1015	0.0997	0.0834	0.085	0.3474	0.3537	0.8881	0.9432	2.3134	2.2858	1.7486	1.7195	2.3046	2.2908	0.9359	0.9305	1.0094	1.0088	2.1674	2.211	2.0982	2.0575	1.3145	1.2926	0.8487	0.8316	0.9861	1.0134	1.9514	1.9776	0.1414	0.1503
2500			1.3483	1.331	0.0918	0.0915	0.2672	0.2759	0.116	0.1158	1.257	1.3096	0.3643	0.3525	0.6283	0.6169	0.0684	0.0694	0.0638	0.0641	0.1309	0.131	0.3239	0.3556	1.902	1.839	0.9176	0.8915	1.9507	1.9527	0.3301	0.3205	0.341	0.3556	1.7222	1.7975	1.4712	1.4292	0.5461	0.5347	0.2911	0.2927	0.3734	0.3928	1.1716	1.1604	0.0835	0.0853
12500			0.5494	0.5601	0.0628	0.0614	0.1074	0.1073	0.0675	0.0655	0.5034	0.543	0.1205	0.1178	0.219	0.2153	0.0499	0.0502	0.0459	0.0452	0.0631	0.0665	0.1201	0.1309	1.0833	1.0393	0.3082	0.3113	1.1642	1.2039	0.1174	0.1241	0.1192	0.1186	0.9875	1.0516	0.5763	0.5596	0.1798	0.1785	0.106	0.1041	0.1278	0.1255	0.406	0.4194	0.0497	0.0517

## Sheet: H173Y+del.DSV
DILUTION -1			AE244 tags	AE244 tags	CN54	CN54	BG505	BG505	JRFL	JRFL	M.Cons	M.Cons	AC10	AC10	96ZM651	96ZM651	HIVIII	HIVIII	9021	9021	63521	63521	1086	1086	Autologous	Autologous	93TH75	93TH75	1086 tags	1086 tags	Bal	Bal	MN	MN	ZM249 tags	ZM249 tags	16055	16055	CM235	CM235	T/F61	T/F61	T/F94	T/F94	T/F100	T/F100	SF162	SF162
100			2.2495		0.897		1.6095		0.679		2.2038		1.0701		1.8241		0.2757		0.2952		1.0258		1.5638		2.3129		1.6687		2.2941		1.7612		1.9219		2.2461		2.3057		1.7082		1.4511		1.622		2.2649		0.5312
500			1.9048	1.9609	0.324	0.3346	0.737	0.7616	0.2888	0.282	1.8946	1.9907	0.471	0.4377	1.2018	1.2181	0.1301	0.1328	0.1357	0.1289	0.4092	0.4319	0.7058	0.7664	2.229	2.1373	0.918	0.9078	2.0476	2.092	0.9971	1.0291	1.2393	1.2948	2.0505	2.1371	2.1341	2.0626	0.9749	0.9667	0.6202	0.6621	0.6982	0.7113	1.768	1.8366	0.2239	0.2364
2500			1.1229	1.1188	0.1312	0.1315	0.2689	0.2798	0.1229	0.125	1.1082	1.1458	0.1645	0.1636	0.5003	0.5137	0.0807	0.081	0.0764	0.0767	0.1549	0.148	0.2216	0.2448	1.8586	1.8632	0.3101	0.3138	1.4434	1.4536	0.3656	0.367	0.4809	0.5059	1.3637	1.4284	1.4944	1.5154	0.3461	0.3484	0.2082	0.2161	0.2219	0.2225	0.9099	0.9432	0.0997	0.1132
12500			0.3651	0.3579	0.0639	0.0664	0.0924	0.1242	0.0655	0.0649	0.3744	0.4043	0.0703	0.069	0.1531	0.1629	0.0689	0.058	0.0521	0.0516	0.0673	0.0666	0.0888	0.111	1.0774	1.0116	0.1017	0.1048	0.5726	0.5784	0.1191	0.1205	0.1494	0.1573	0.6019	0.6008	0.6825	0.6561	0.1145	0.1178	0.0834	0.0808	0.0801	0.0829	0.2943	0.3041	0.062	0.0622

## Sheet: H173Y+del. V1
DILUTION -1			AE244 tags	AE244 tags	CN54	CN54	BG505	BG505	JRFL	JRFL	M.Cons	M.Cons	AC10	AC10	96ZM651	96ZM651	HIVIII	HIVIII	9021	9021	63521	63521	1086	1086	Autologous	Autologous	93TH75	93TH75	1086 tags	1086 tags	Bal	Bal	MN	MN	ZM249 tags	ZM249 tags	16055	16055	CM235	CM235	T/F61	T/F61	T/F94	T/F94	T/F100	T/F100	SF162	SF162
100			2.3117		1.0167		2.0587		0.5692		2.2929		1.0228		2.0775		0.2528		0.2327		1.0036		1.935		2.205		2.0727		2.2711		1.8504		1.9675		2.2756		1.8412		1.9573		1.9915		1.3282		2.2407		0.39
500			1.9469	1.934	0.4433	0.4408	1.6075	1.6557	0.2336	0.2182	2.1424	2.1885	0.4202	0.4164	1.7435	1.7717	0.1185	0.1207	0.1178	0.1148	0.4597	0.4574	1.4322	1.5369	1.9877	1.9579	1.5916	1.6406	2.2481	2.224	1.3113	1.3114	1.5066	1.5334	2.22	2.2159	1.2514	1.2309	1.2882	1.2938	1.4344	1.4489	0.59	0.6005	1.8725	1.9134	0.1749	0.1792
2500			1.0972	1.0619	0.1711	0.1731	0.8831	0.9141	0.1192	0.1073	1.7485	1.7975	0.1728	0.1609	1.209	1.1779	0.0839	0.0828	0.0802	0.081	0.1717	0.1719	0.7049	0.7398	1.5307	1.4868	0.8403	0.855	2.0535	2.0776	0.5761	0.573	0.7171	0.711	1.8414	1.8909	0.4395	0.4518	0.5152	0.5189	0.6342	0.6605	0.2138	0.2256	1.1498	1.1372	0.0932	0.0983
12500			0.3828	0.3865	0.0771	0.076	0.3437	0.3381	0.0648	0.0668	0.9772	0.995	0.0728	0.076	0.5038	0.527	0.0564	0.0576	0.0517	0.0513	0.0713	0.0775	0.2691	0.2528	0.7198	0.6893	0.2884	0.2901	1.4648	1.4656	0.1902	0.1955	0.2345	0.2332	1.2324	1.2815	0.1785	0.1694	0.1766	0.1783	0.2183	0.2108	0.0879	0.0928	0.4526	0.4338	0.0618	0.0592
